# Supplementary material
Source: Springer Nature journal article supplement (https://www.springermedizin.de/resource/supplementary/12913_2011_1957_MOESM2_ESM.pdf/9529226)

■ Primary Care Initiatives □ Scottish Diabetes Survey ■ National Diabetes Audit England

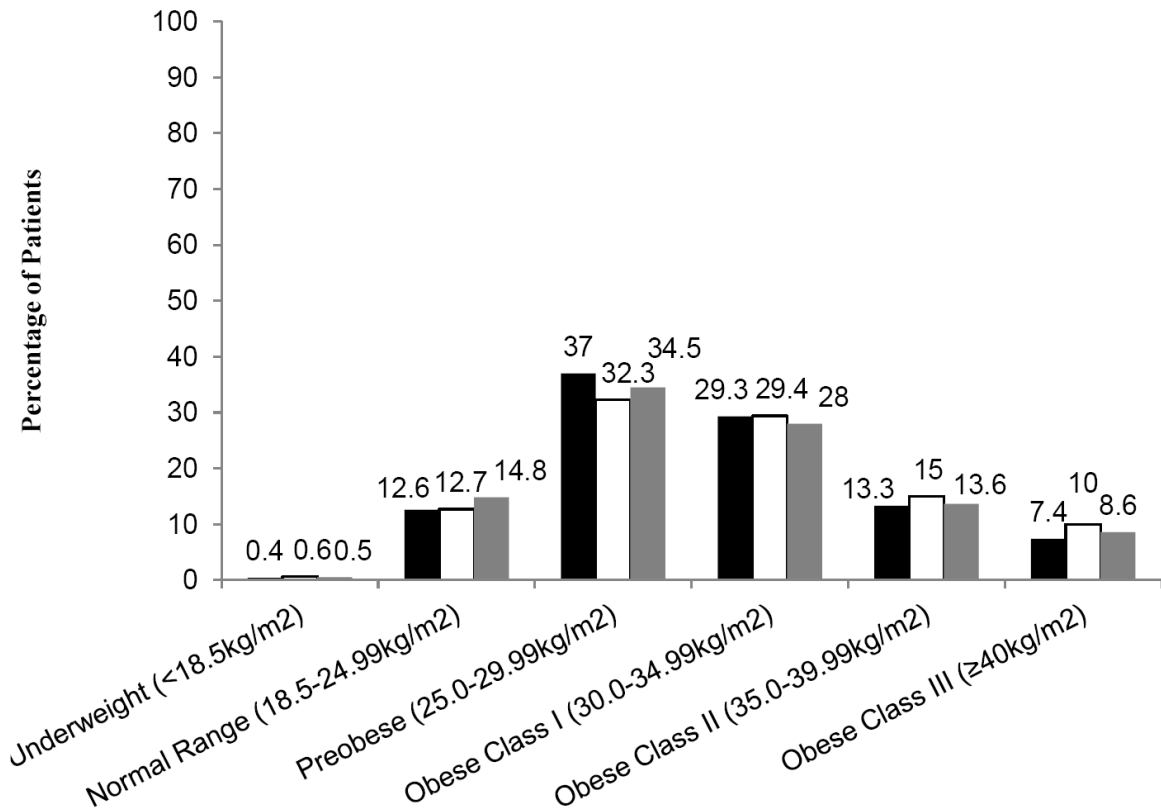

Supplement: MOESM2 [file 9529226]
